# Supplementary material
Source: PubMed Central journal article supplement (PMC2891057)
Supplement: NIHMS199668-supplement-1_si_001.pdf [file NIHMS199668-supplement-1_si_001.pdf]

## **Supplementary Material.**

NMR relaxation studies of an RNA-binding segment of the Rous sarcoma virus Gag polyprotein in free and bound states - a model for autoinhibition of assembly

Gwen M. Taylor<sup>1</sup>, Lixin Ma<sup>1</sup>, Volker M. Vogt<sup>2</sup> and Carol Beth Post<sup>1</sup>

*<sup>1</sup>Department of Medicinal Chemistry and Molecular Pharmacology, Markey Center for Structural Biology and Purdue Cancer Center, Purdue University, West Lafayette, Indiana*

*47907*

*<sup>2</sup>Department of Molecular Biology and Genetics, Cornell University, Ithaca, New York 14853*

**keywords: retrovirus, virus assembly, gag polyprotein, multidomain protein dynamics**

## Spectral density mapping for unbound and (GT)<sub>4</sub> bound CTD-SP-NC

Main chain dynamics of CTD-SP-NC measured by <sup>15</sup>N heteronuclear relaxation were characterized by spectral density mapping(*I*), a structure-independent approach, and the results are shown in Supplementary Figures 1 and 2. Averages over regions grouped based on relaxation behavior are listed in Supplementary Tables 1 and 2.

### Dynamics of SP and flanking region in unbound CTD-SP-NC

Theoretical curves for  $R_2$  and  $R_1$  as a function of overall correlation time are shown in Supplementary Figure 3 for the four motional models described in the article. Anisotropic rotation, shown in the left panel for axially symmetric rotation, affects the value of  $R_2$  opposite in direction to that of  $R_1$ . Internal motion decreases both relaxation rates.

A general description of the dynamics of SP and flanking regions is concluded based on the combined average values measured for  $I/I_0$ , and  $R_1$  and  $R_2$ . The observed average value is  $I/I_0 \sim 0$ . Neither model 2 (anisotropic rotation) nor model 3 (very fast internal motion, single overall correlation time) can account for the observation that  $I/I_0 \sim 0$ . For model 1,  $I/I_0 \sim 0$  occurs at  $\tau_m = 1$  ns, a relatively short correlation time corresponding to a fully flexible linker. This value  $\tau_m \sim 1$  ns falls to the left of the  $R_1$  maximum so that the predicted  $R_1$  and  $R_2$  would be similar in value (for  $\tau_m = 1$  ns,  $R_1 = 2.0$  and  $R_2 = 2.5$  s<sup>-1</sup>). For model 4,  $R_2$  is greater than  $R_1$  and we use the example  $S^2 = 0.5-0.6$ ,  $\tau_{int} \sim 0.4$  ns,  $\tau_m = 5 - 7$  ns for the predicted  $R_1$  and  $R_2$  values listed in Supplementary Table 4. For SP and flanking regions, the observed  $R_1$  ranges from 1.8 – 2.1 s<sup>-1</sup> and  $R_2$  ranges from 6 – 13 s<sup>-1</sup>. While  $R_1$  cannot readily discriminate models 1 and 4, the observed  $R_2$  values are significantly greater and more variable than the values expected for model 1 and a fully flexible chain characterized by  $\tau_m \sim 1$  ns. Model 4 more closely reproduces the overall relaxation behavior of the SP and flanking region; however, experimental  $R_2$  values for several residues are underestimated by the theoretical relaxation curves. That  $R_2$  values for this region are underestimated suggests that exchange ( $R_{ex}$ ) contributes to  $R_2$ .

1. Peng, J. W., and Wagner, G. (1992) Mapping of the spectral densities of nitrogen-hydrogen bond motions in Eglin c using heteronuclear relaxation experiments, *Biochemistry* 31, 8571-8586.

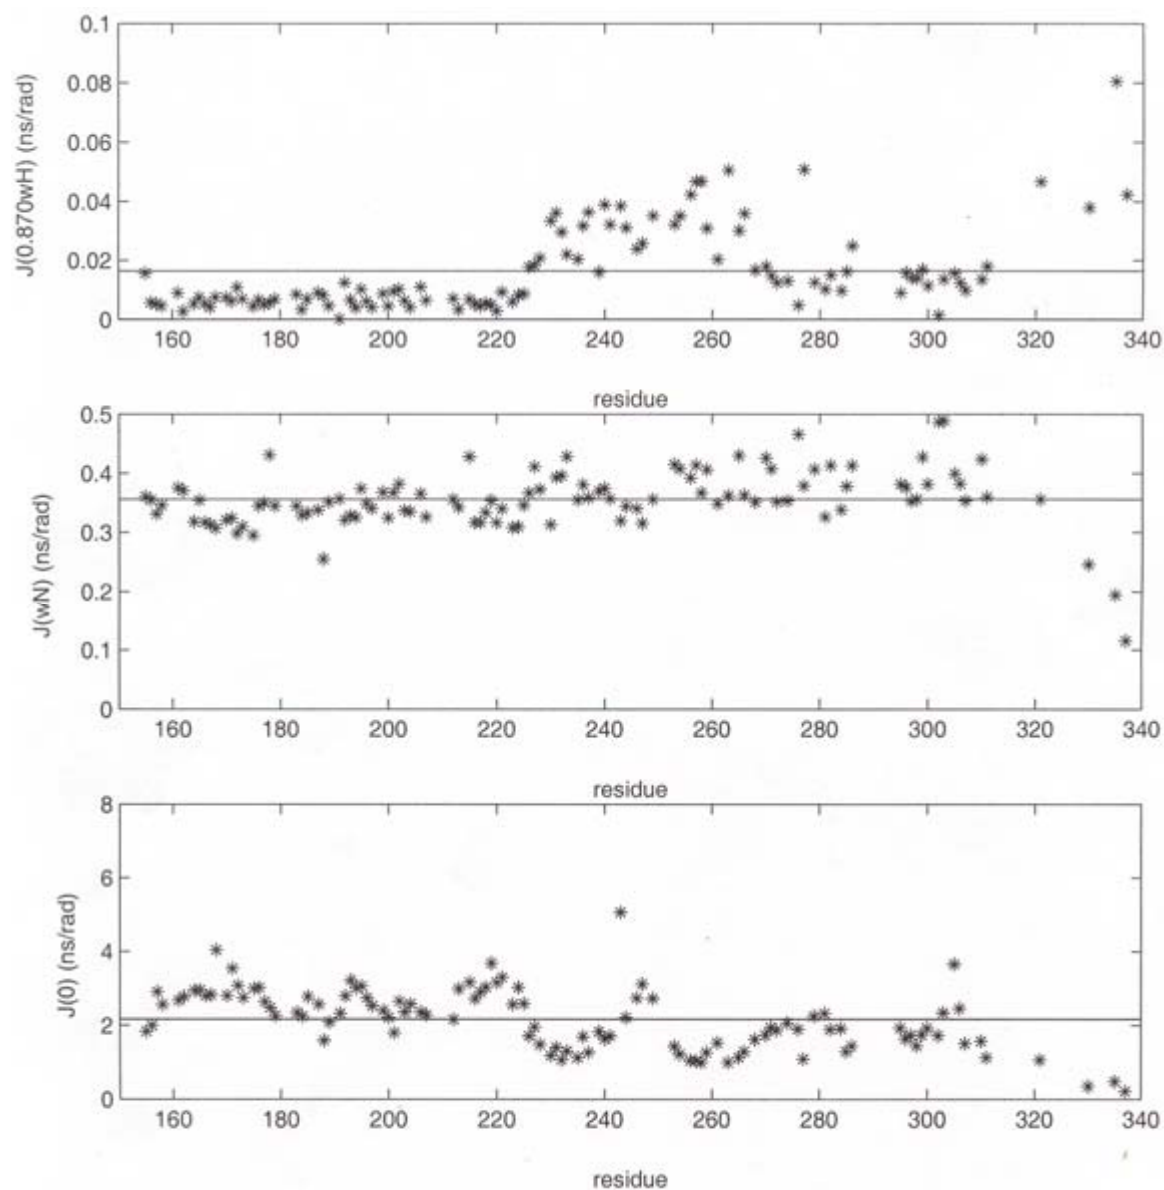

**Supplementary Figure 1.** Spectral density mapping of RSV CTD-SP-NC in the apo form at 11.74 T. The average  $J(0.87\omega_H)$  is  $1.64 \times 10^{-11}$ ,  $J(\omega_N)$  is  $3.33 \times 10^{-10}$ , and  $J(0)$  is  $2.16 \times 10^{-9}$ .

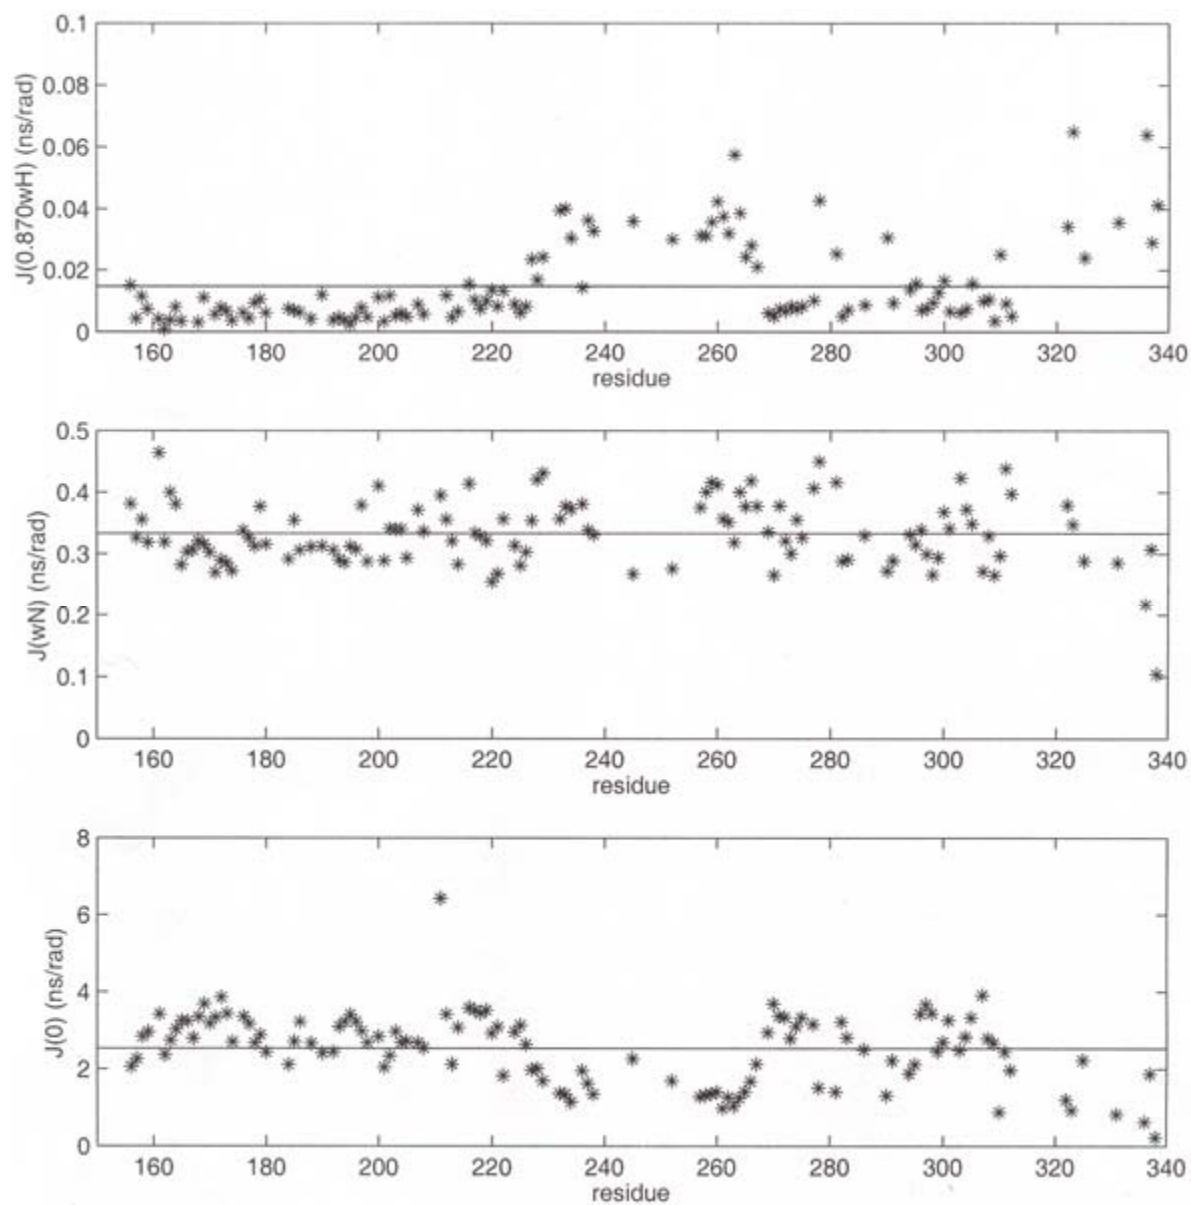

**Supplementary Figure 2.** Spectral density mapping of RSV CTD-SP-NC in the bound form at 11.74 T. The average  $J(0.87\omega_H)$  is  $1.47 \times 10^{-11}$ ,  $J(\omega_N)$  is  $3.33 \times 10^{-10}$ , and  $J(0)$  is  $2.52 \times 10^{-9}$ .

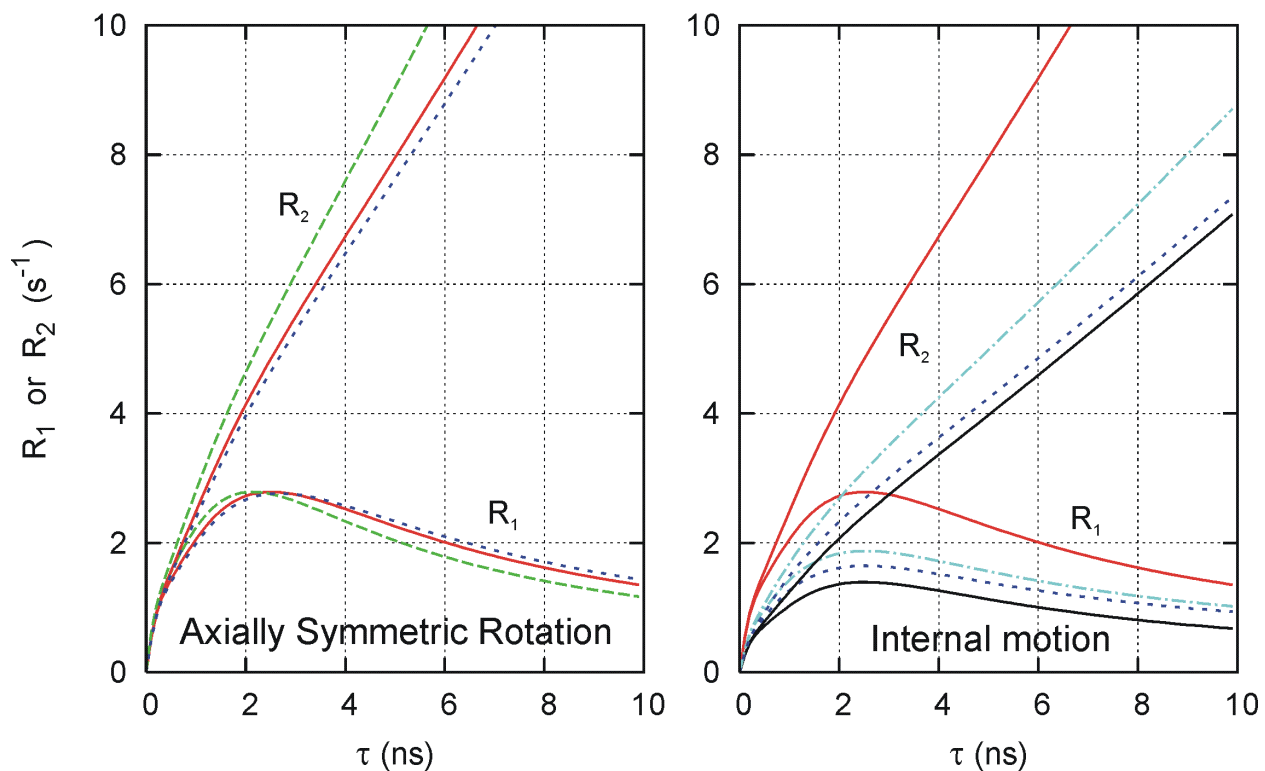

**Supplementary Figure 3.**  $R_2$  and  $R_1$  as a function of overall correlation time,  $\tau_m$ , for four motional models. Model 1, isotropic rotation with a single overall rotational correlation time (solid, red) is shown in both panels for reference. Left panel: Axially symmetric rotation with  $D_{zz} = D_{\parallel} = 1.3$  and  $D_{xx} = D_{yy} = D_{\perp} = 0.85$ , and  $\tau_m = 1/\left[2(D_{xx} + D_{yy} + D_{zz})\right]$ . Two curves delimit the relaxation for N-H bond vectors aligned parallel (dashed, green) or perpendicular (dotted, blue) to the z-axial component of the diffusion tensor. Right panel: Overall isotropic rotation with faster internal motion. Model 3, a single correlation function including very fast internal motion squares,  $S^2 = 0.5$  (solid, black). Model 4, internal motion with  $\tau_{\text{int}} = 0.1$  ns and  $S^2 = 0.6$  (dash-dot, cyan) or 0.5 (dotted, blue).

Supplementary Table 1. Average spectral density data for RSV CTD-SP-NC in the unbound state.

|           | residues  | J(0)          | J( $\omega_N$ )     | J( $0.87\omega_H$ ) |
|-----------|-----------|---------------|---------------------|---------------------|
|           |           | (ns/rad)      | (ns/rad $10^{-1}$ ) | (ns/rad $10^{-2}$ ) |
| CTD       | 394 - 474 | $2.5 \pm 0.6$ | $3.4 \pm 0.3$       | $0.9 \pm 0.7$       |
| SP        | 475 - 489 | $2.4 \pm 1.1$ | $3.5 \pm 0.2$       | $3.1 \pm 0.7$       |
| N-term NC | 490 - 505 | $1.2 \pm 0.2$ | $3.9 \pm 0.3$       | $3.5 \pm 1.1$       |
| NC core   | 509 - 548 | $1.9 \pm 0.5$ | $3.9 \pm 0.4$       | $1.5 \pm 0.9$       |
| ZF 1      | 509 - 522 | $1.9 \pm 0.4$ | $3.9 \pm 0.4$       | $1.7 \pm 0.1$       |
| ZF 2      | 535 - 548 | $2.0 \pm 0.7$ | $4.0 \pm 0.5$       | $1.2 \pm 0.4$       |

Supplementary Table 2. Average spectral density data for RSV CTD-SP-NC in the bound state.

|           | residues  | J(0)          | J( $\omega_N$ )     | J( $0.87\omega_H$ ) |
|-----------|-----------|---------------|---------------------|---------------------|
|           |           | (ns/rad)      | (ns/rad $10^{-1}$ ) | (ns/rad $10^{-2}$ ) |
| CTD       | 394 - 474 | $2.8 \pm 0.8$ | $3.3 \pm 0.4$       | $0.9 \pm 0.8$       |
| SP        | 475 - 489 | N.D.          | N.D.                | N.D.                |
| N-term NC | 490 - 505 | $1.7 \pm 0.8$ | $3.6 \pm 0.5$       | $3.0 \pm 1.4$       |
| NC core   | 509 - 548 | $2.8 \pm 0.7$ | $3.3 \pm 0.5$       | $1.2 \pm 0.9$       |
| ZF 1      | 509 - 522 | $2.8 \pm 0.7$ | $3.5 \pm 0.6$       | $1.3 \pm 1.2$       |
| ZF 2      | 535 - 548 | $3.1 \pm 0.5$ | $3.2 \pm 0.5$       | $1.0 \pm 0.4$       |

Supplementary Table 3.  $S^2$  values calculated by TENSOR

|                     | residues  | $S^2$ |
|---------------------|-----------|-------|
| CTD                 | 397 - 467 | 0.874 |
| SP+flanking regions | 468 - 507 |       |
| C-term CTD          | 468 - 477 |       |
| SP                  | 479 - 493 |       |
| N-term NC           | 495 - 507 |       |
| NC core             | 509 - 548 | 0.642 |
| ZF 1                | 509 - 522 | 0.707 |
| ZF 2                | 535 - 548 | 0.671 |

Supplementary Table 4. Observed  $R_1$  and  $R_2$  values for SP\* (residues 479 - 493) and the flanking regions (residues 468 - 477 and 495 - 507) compared to predicted values for model 1 or 4 at  $\tau_m$  values with the condition  $I/I_0$  is near zero.

|                                                      | $R_1$ (s <sup>-1</sup> ) | $R_2$ (s <sup>-1</sup> ) |
|------------------------------------------------------|--------------------------|--------------------------|
| Observed                                             |                          |                          |
| Flanking C-term CTD                                  | ~2.2                     | ~6.4                     |
| SP* <sup>c</sup>                                     | 1.8 to 2.2               | 6 to 13                  |
| Flanking N-term NC                                   | ~2.4                     | ~5.5                     |
| Predicted                                            |                          |                          |
| Model 1, expected for $\tau_m = 1$ ns <sup>a</sup>   | 2.0                      | 2.5                      |
| Model 4, expected for $\tau_m = 5-7$ ns <sup>b</sup> | 1.9                      | 4 to 7                   |

<sup>a</sup> Predicted values (Figure S3) calculated for a single overall correlation time, no internal motion.

<sup>b</sup> Predicted values (Figure S3) calculated for slow internal motion parameters are  $S^2=0.5$  to  $0.6$  and  $\tau_{int}=0.4$  ns.

<sup>c</sup> SP\* residue range is based on relaxation behavior and differs somewhat from SP residues 477-488.
